# Supplementary material for: A natural biogenic fluorapatite as a new biomaterial for orthopedics and dentistry: antibacterial activity of lingula seashell and its use for nanostructured biomimetic coatings
Source: Royal Society of Chemistry journal article supplement (doi:10.1039/d3tb02454g), 2024-01-01
Supplement: d3tb02454g1.pdf [file d3tb02454g1.pdf]

## Supplementary Material

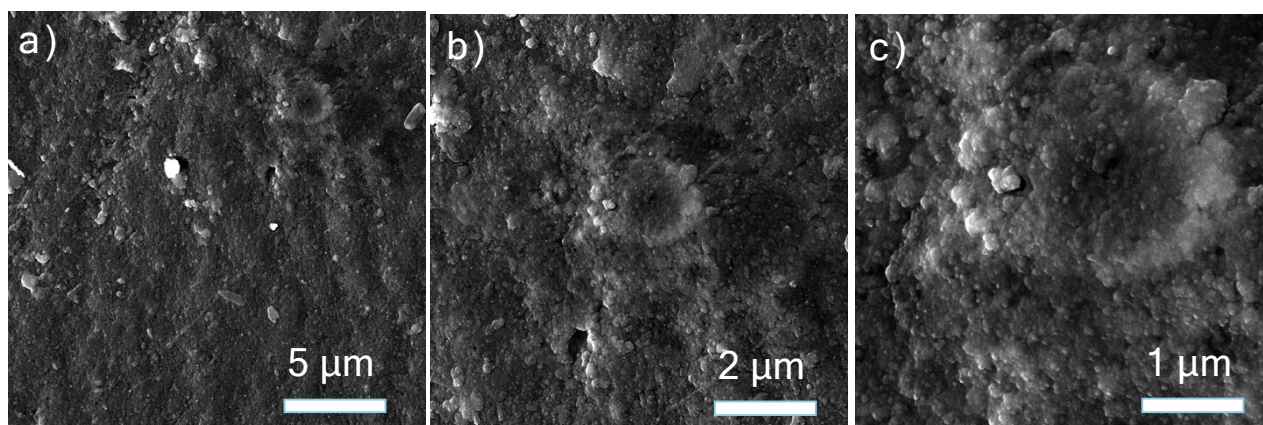

**Fig. S1.** SEM/EDS of *L. anatina* seashell.

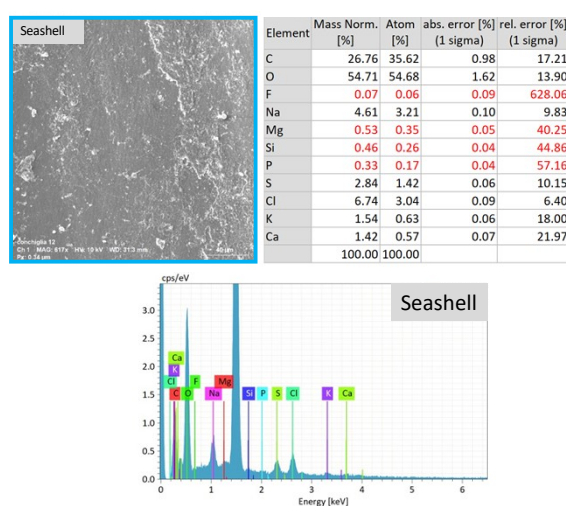

**Fig. S2.** EDS data of the seashell

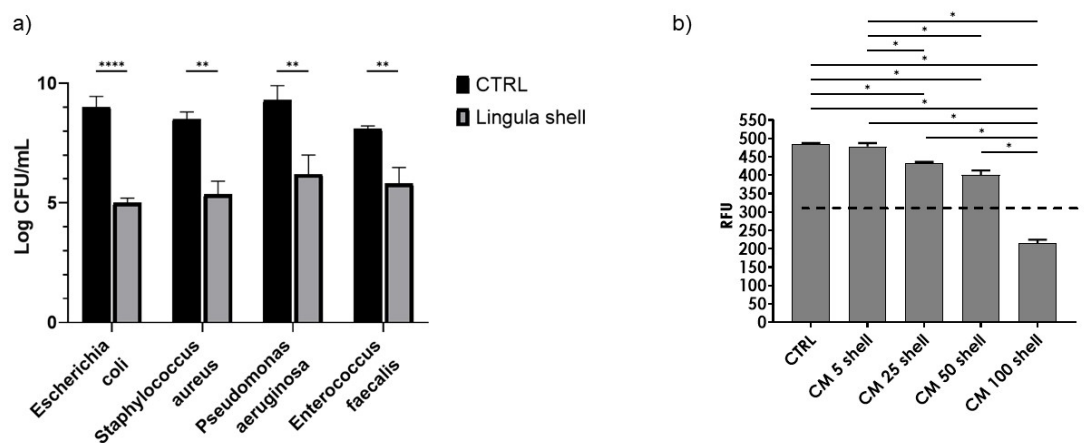

**Fig. S3.** a) Antibacterial activity of lingula seashell. b) Cell viability of MG-63 after 24h of maintenance with conditioned medium (CM) derived from shell at different dilutions with fresh

culture medium (100:0, 50:50, 25:75, and 5:95). The dashed line is for CTRL at just seeded. \*: p-value < 0.05; \*\* p-value < 0.01; \*\*\*\*: p-value < 0.0001.

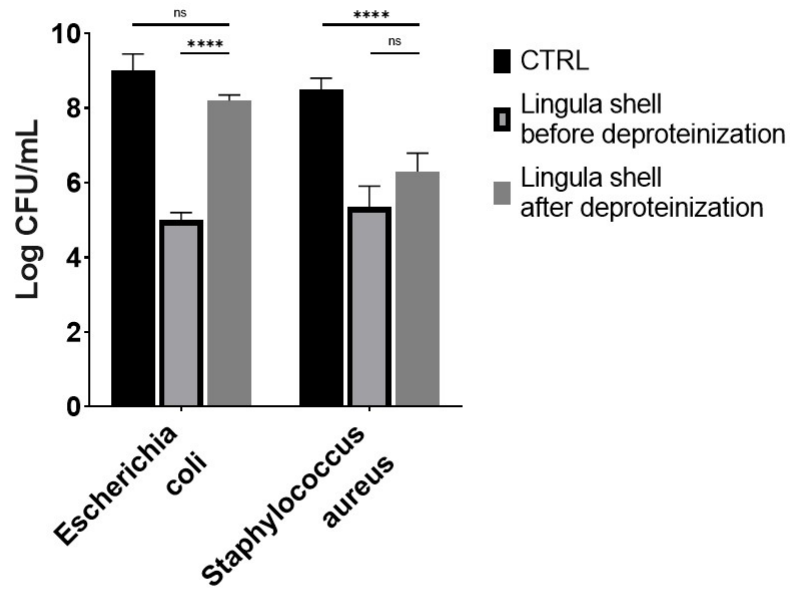

**Fig. S4.** Antibacterial efficacy of the shell before and after deproteinization. ns (not significant): p-value > 0.05; \*\*\*\*: p-value < 0.0001.

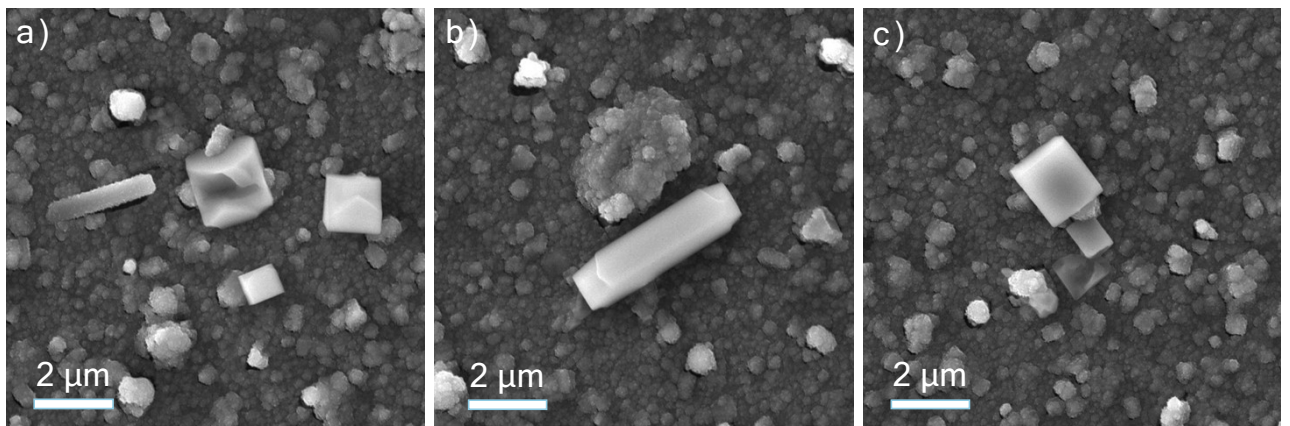

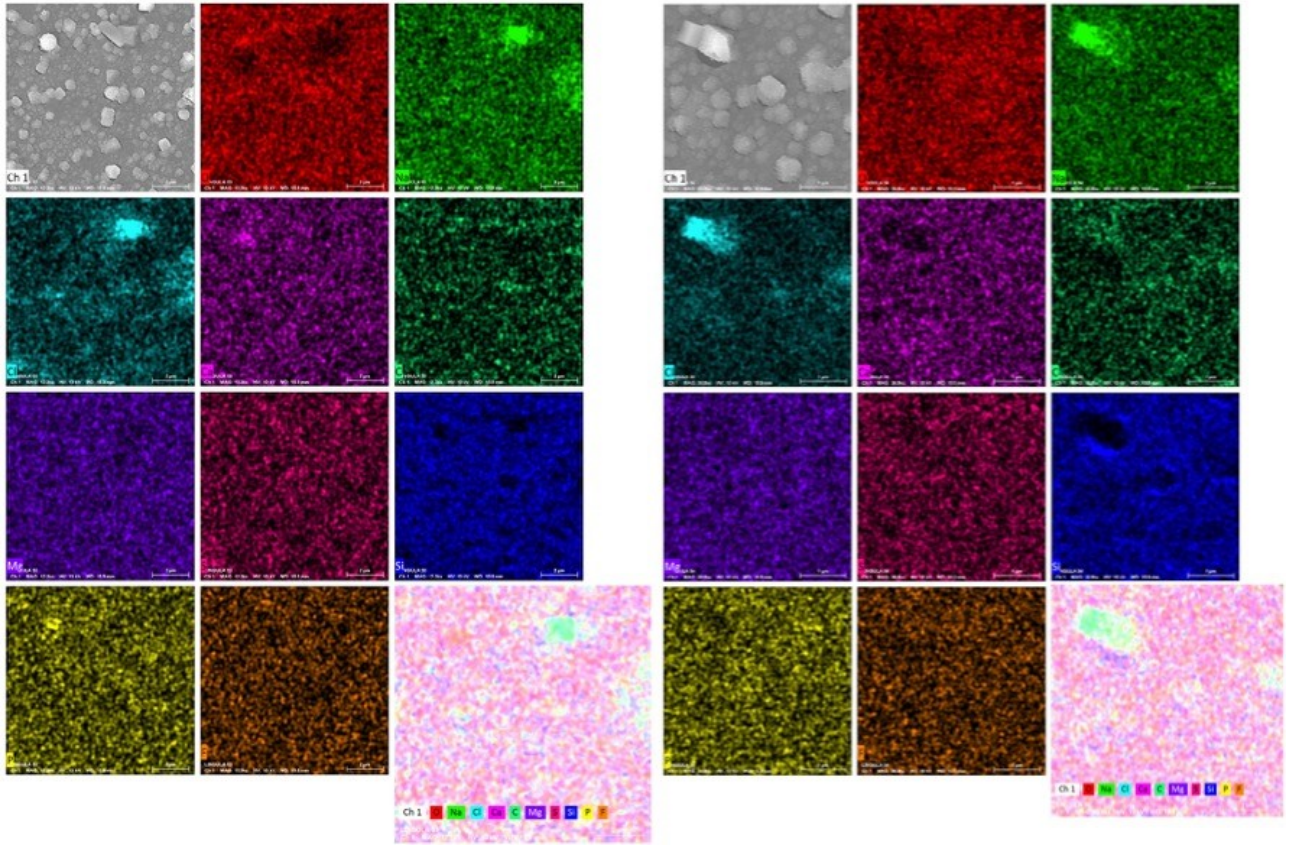

**Fig. S5.** NaCl crystals, if not removed, reform on the coating surface.

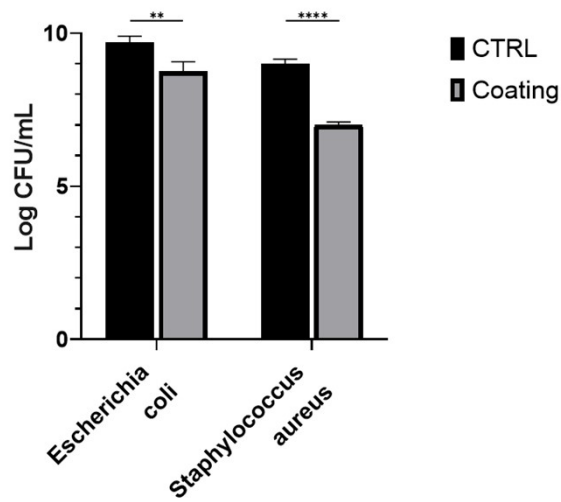

**Fig. S6.** Antimicrobial efficacy of the lingula coatings.

**Table S1**

Bacterial reduction efficacy of *Lingula* shell with and without heat treatment

|                               | Lingula shell       | Lingula shell after 400 °C treatment |
|-------------------------------|---------------------|--------------------------------------|
| <i>Escherichia coli</i>       | 99.99% <sup>a</sup> | 84.15%                               |
| <i>Staphylococcus aureus</i>  | 99.93%              | 99.37%                               |
| <i>Pseudomonas aeruginosa</i> | 99.92%              | ND <sup>b</sup>                      |
| <i>Enterococcus faecalis</i>  | 99.49%              | ND                                   |

<sup>a</sup> Bacterial reduction is expressed as percentage of bacterial concentration (CFU mL<sup>-1</sup>) reduction compared to control experiments

<sup>b</sup> ND = not determined

Table S2. Substitution ratios, as assessed by ICP<sup>a</sup>

|              | Lingula shell | Coating |
|--------------|---------------|---------|
| <i>K/Ca</i>  | 0.054         | 0.029   |
| <i>Mg/Ca</i> | 0.073         | 0.033   |
| <i>Mn/Ca</i> | 0.001         | 0,002   |
| <i>Na/Ca</i> | 0,189         | 0,042   |
| <i>Sr/Ca</i> | 0,003         | 0,007   |
| <i>Zn/Ca</i> | 0,001         | 0,037   |

<sup>a</sup> Values are calculated as the ratio between ppm of each ion and ppm of Ca, for the shell and the coating.
